# Supplementary material
Source: PubMed Central journal article supplement (PMC2856244)
Supplement: supp_M109.055947_jbc.M109.055947-1.pdf [file supp_M109.055947_jbc.M109.055947-1.pdf]

## Suppl. Figure 1

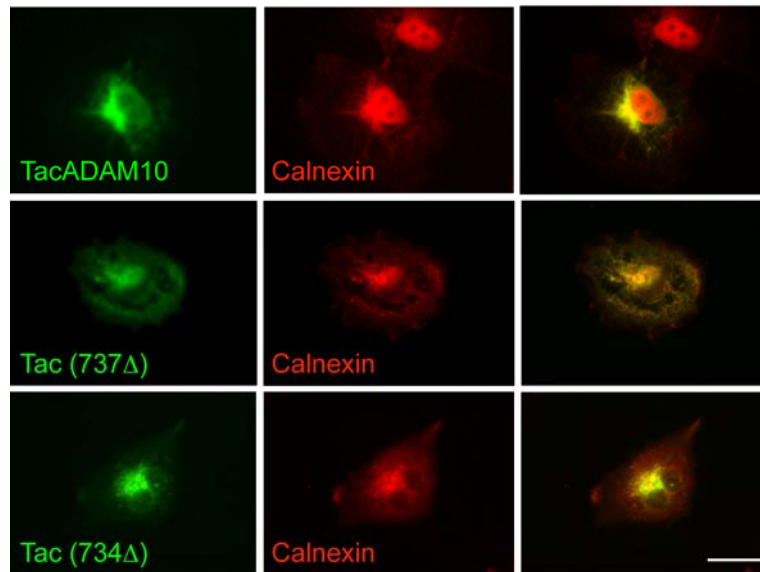

**SUPPLEMENTARY FIGURE 1** COS7 cells were transiently transfected with TacADAM10 deletion mutants, permeabilized and stained with antibodies against Tac (*Green*) and ER marker calnexin (*Red*). TacADAM10, Tac737Δ and 734Δ showed a perinuclear staining and extensive colocalization (*Yellow*) with calnexin.
